# Supplementary material for: Network of gold conjugates for enhanced sensitive immunochromatographic assays of troponins
Source: Royal Society of Chemistry journal article supplement (doi:10.1039/d1ra02212a), 2021-01-01
Supplement: d1ra02212a1.pdf [file d1ra02212a1.pdf]

## Supplementary materials

# Network of gold conjugates for enhanced sensitive immunochromatographic assays of troponins

Nadezhda A. Taranova<sup>a</sup>, Vladislav D. Slobodenuyk<sup>a</sup>, Anatoly V. Zherdev<sup>a</sup> and Boris B. Dzantiev<sup>\*a</sup>

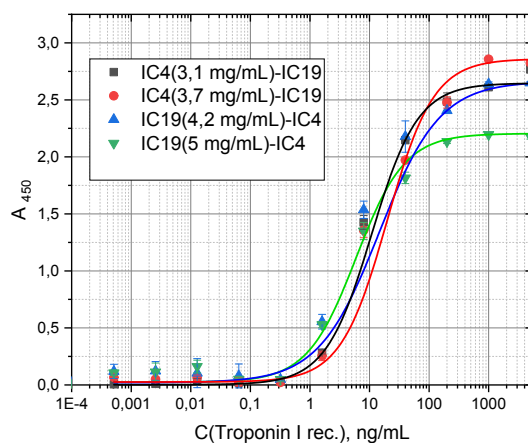

Fig. S1. ELISA for cTnI

Table S1. ELISA data for cTnI

| Combinations   | IC10, ng/mL | IC20, ng/mL |
|----------------|-------------|-------------|
| IC4 (3.1)–IC19 | 1.52        | 3.15        |
| IC4 (3.7)–IC19 | 2.50        | 5.43        |
| IC19 (4.2)–IC4 | 1.01        | 2.73        |
| IC19 (5.0)–IC4 | 0.66        | 1.50        |

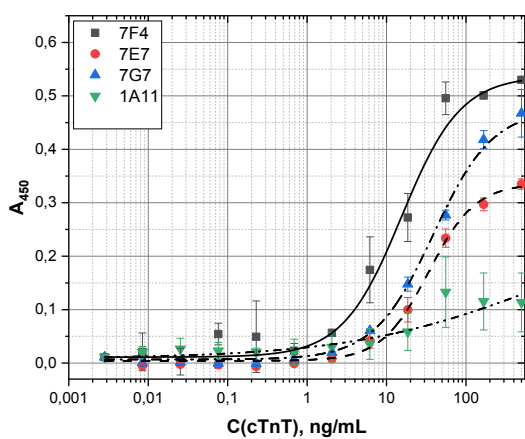

a)

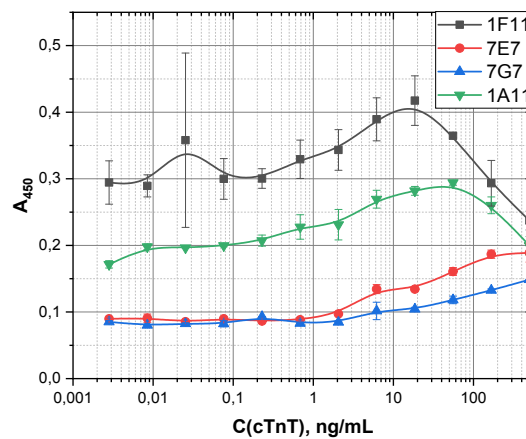

b)

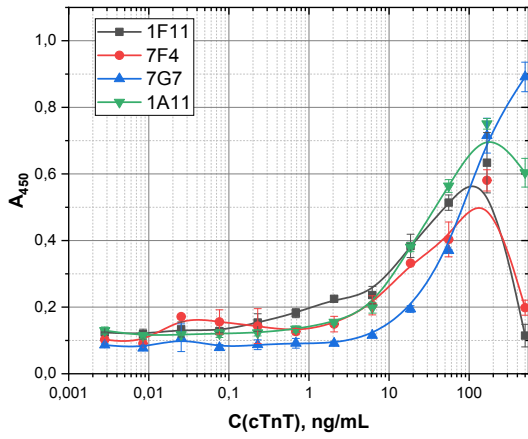

c)

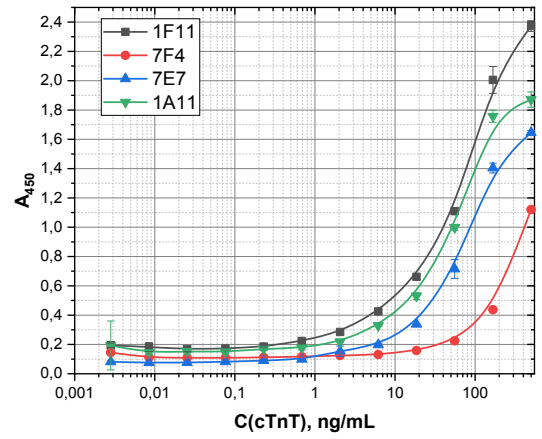

d)

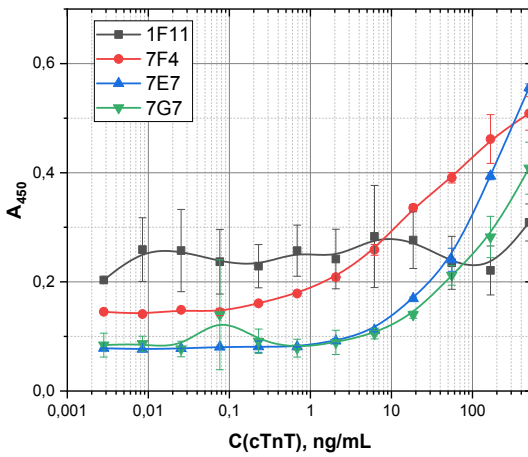

f)

Fig. S2. ELISA for cTnT: a) 1F11cc immobilised; b) 7F4 immobilised; c) 7E7 immobilised; d) 7G7 immobilised; f) 1A11 immobilised

Table S2. ELISA data for cTnT

| Immobilised | Abs-biotin                                                                 |                                             |                                              |                                              |                                              |
|-------------|----------------------------------------------------------------------------|---------------------------------------------|----------------------------------------------|----------------------------------------------|----------------------------------------------|
|             | 1F11                                                                       | 7F4                                         | 7E7                                          | 7G7                                          | 1A11                                         |
| 1F11        |                                                                            | IC10 1.88<br>IC20 4.2<br>$\Delta A$ 0.53365 | IC10 6.9<br>IC20 12.5<br>$\Delta A$ 0.34187  | IC10 5.1<br>IC20 10.9<br>$\Delta A$ 0.43598  | IC10 0.6<br>IC20 9.8<br>$\Delta A$ 0.15237   |
| 7F4         | IC10 -<br>IC20 -<br>$\Delta A$ 0.04943                                     |                                             | IC10 2.95<br>IC20 5.98<br>$\Delta A$ 0.08836 | IC10 10.8<br>IC20 24.9<br>$\Delta A$ 0.06202 | IC10 -<br>IC20 -<br>$\Delta A$ 0.0339        |
| 7E7         | IC10 0.82<br>IC20 2.43<br>$\Delta A$ 0.57266                               | IC10 3.1<br>IC20 6.4<br>$\Delta A$ 0.50067  |                                              | IC10 18<br>IC20 35.4<br>$\Delta A$ 0.77634   | IC10 5.8<br>IC20 10<br>$\Delta A$ 0.49697    |
| 7G7         | <b>IC10 1.7</b><br><b>IC20 8.7</b><br><b><math>\Delta A</math> 2.19357</b> | IC10 171<br>IC20 319<br>$\Delta A$ 0.99508  | IC10 12.7<br>IC20 25.1<br>$\Delta A$ 1.55846 |                                              | IC10 11.7<br>IC20 21.4<br>$\Delta A$ 1.83289 |
| 1A11        | IC10 -<br>IC20 -<br>$\Delta A$ 0.13284                                     | IC10 0.83<br>IC20 2.4<br>$\Delta A$ 0.38482 | IC10 14<br>IC20 36.6<br>$\Delta A$ 0.48243   | IC10 18<br>IC20 27.9<br>$\Delta A$ 0.30601   |                                              |

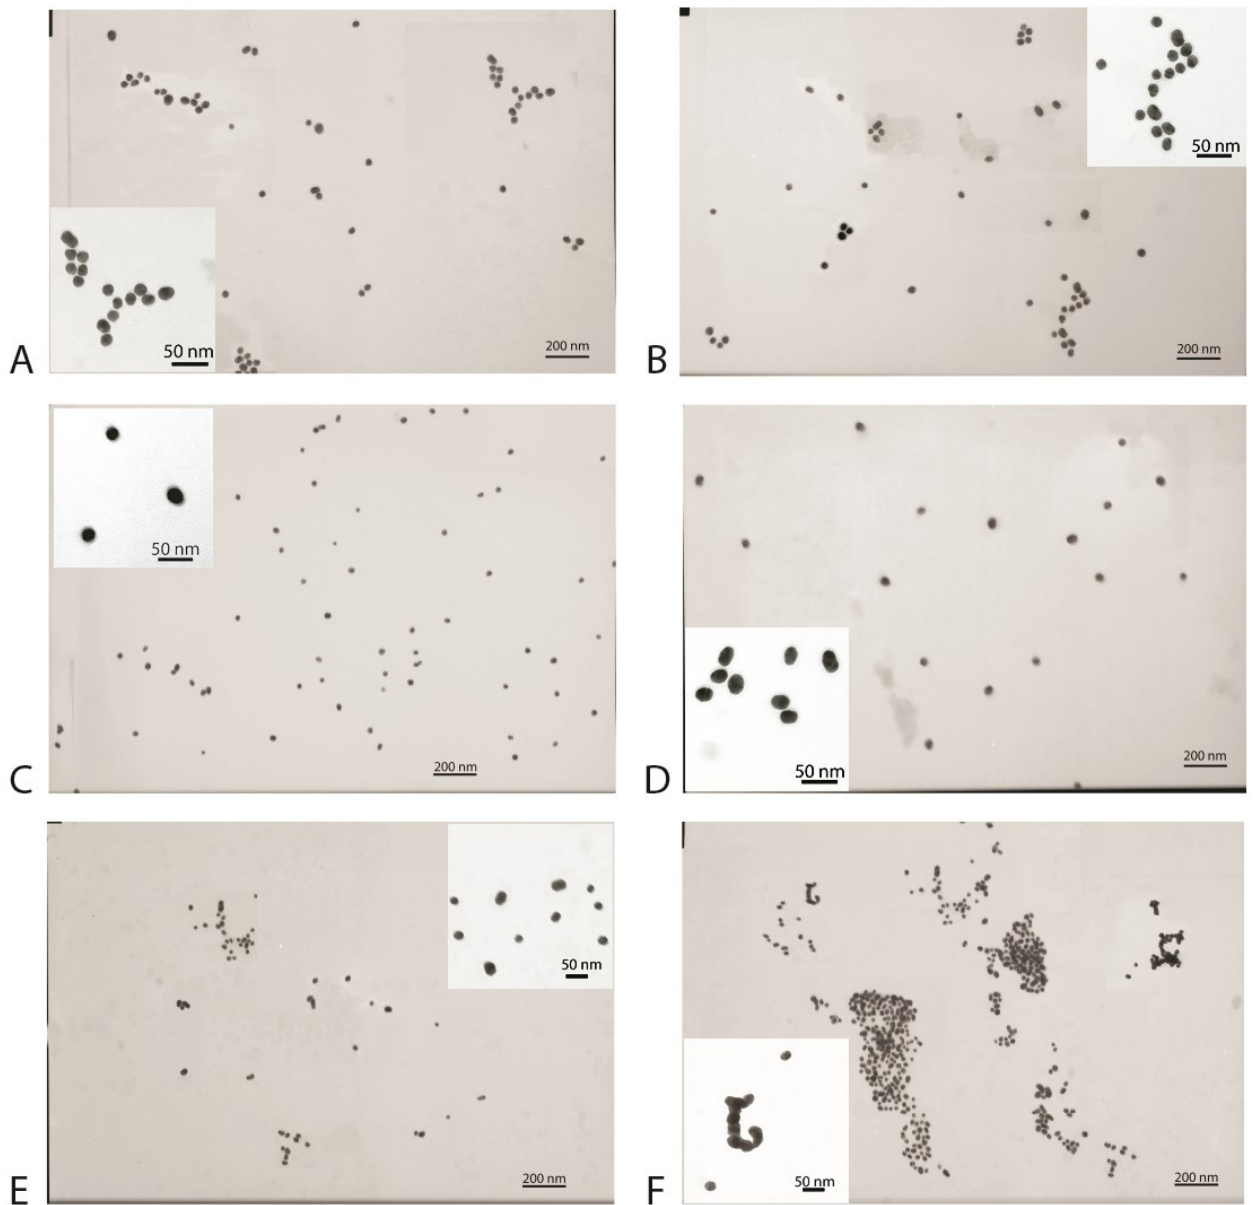

**Figure S3.** TEM data for native GNPs and its conjugates for cTnT detection (as example): (A) GNPs  $29.3 \pm 0.9$  nm; (B) GNP-Abs/cTnT  $31.5 \pm 0.5$  nm; (C) GNP-Stp  $32.1 \pm 0.8$  nm; (D) GNP-BSA-biotin  $29.8 \pm 0.8$  nm; (E) GNP-Abs/cTnT-biotin  $32.7 \pm 3.8$ ; (F) GNP-Stp : GNP-BSA-biotin : GNP-Abs/cTnT-biotin  $32.2 \pm 10.7$  nm

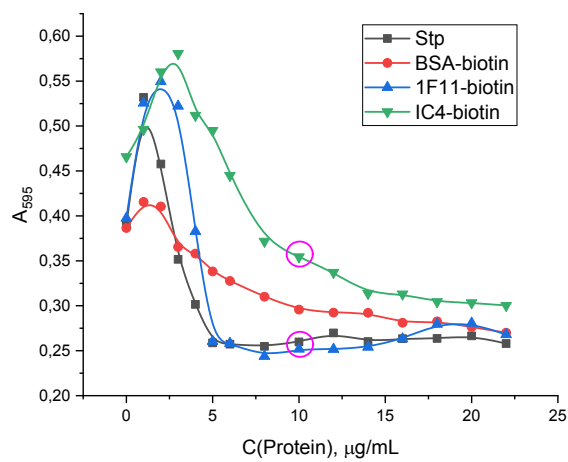

**Fig. S4.** Absorption curves for proteins

**Table S3.** Effect of optical density on detecting GNP-Abs conjugates on vLODs

| Analyte | A(GNP–Abs) |      |      |      |
|---------|------------|------|------|------|
|         | LoD, ng/mL |      |      |      |
|         | 1          | 2    | 4    | 5    |
| cTnI    | 100        | 100  | 33.3 | 11.1 |
| cTnT    | 33.3       | 11.1 | 11.1 | 11.1 |

**Table S4.** Influence of the concentration of antibodies immobilised in the analytical zone on vLoDs

| Analyte | C(Abs immobilised), mg/mL |      |      |
|---------|---------------------------|------|------|
|         | LoD, ng/mL                |      |      |
|         | 1                         | 1.5  | 2    |
| cTnI    | 100                       | 33.3 | 11.1 |

**Table S5.** Influence of the concentration of detergent Tween-20 in the analytical zone on LoDs

| Analyte | Tween 20, % |      |      |      |
|---------|-------------|------|------|------|
|         | LoD, ng/mL  |      |      |      |
|         | 0.1         | 0.25 | 1.0  | 2.0  |
| cTnT    | 100         | 33.3 | 11.1 | 33.3 |

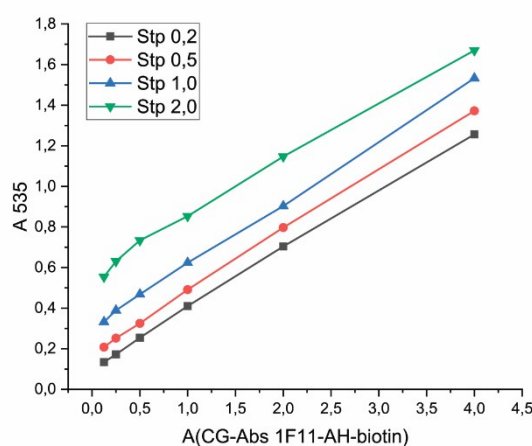

**Fig. S5.** Dependences of the optical density of a mixture of GNPs–Stp and GNPs–Abs/cTnT conjugates on the concentration of GNPs–Abs–biotin

**Table S6.** Theoretical calculations to determine the minimum and maximum amount of CG–Stp conjugate for complete binding of all available biotin groups

| Parameter                                      | Minimum amount of GNP–Stp conjugate |                | Maximum amount of CG–Stp conjugate |                |
|------------------------------------------------|-------------------------------------|----------------|------------------------------------|----------------|
|                                                | GNP–BSA–biotin                      | GNP–Abs–biotin | GNP–BSA–biotin                     | GNP–Abs–biotin |
| Number of protein molecules per 1 GNP, pcs     | 50                                  | 196            | 2110                               | 202            |
| Number of biotin molecules per 1 GNP, pcs      | 756                                 | 2943           | 31658                              | 2038           |
| Number of GNPs per test strip, pcs             | 8E+09                               | 4E+11          | 8E+09                              | 4E+11          |
| Number of biotin molecules per test strip, pcs | 6E+12                               | 1E+13          | 2E+14                              | 1E+13          |
| Number of molecules Stp for all biotin, pcs    | 2E+12                               | 4E+12          | 8.7E+13                            | 4E+12          |
| Number of GNP–Stp particles, pcs               | 1.6E+10                             | 3E+10          | 1.5E+11                            | 7.5E+09        |
| A(GNP–Stp)                                     | 0.08                                | 0.17           | 0.85                               | 0.04           |
| Total A(GNP–Stp)                               |                                     | 0.25           |                                    | 0.89           |

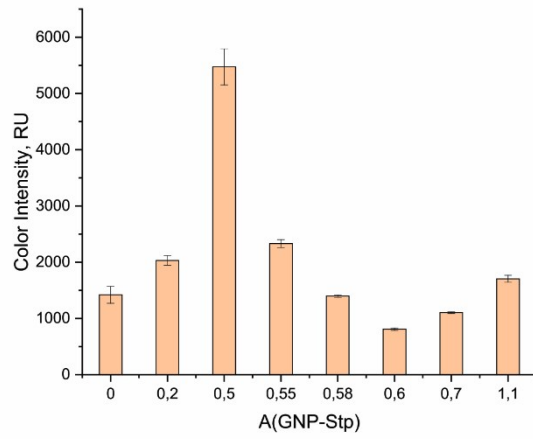

Fig. S6. Varying amounts of GNP–Stp conjugate in the three-component system for C (cTnT) = 3.7 ng mL<sup>-1</sup>

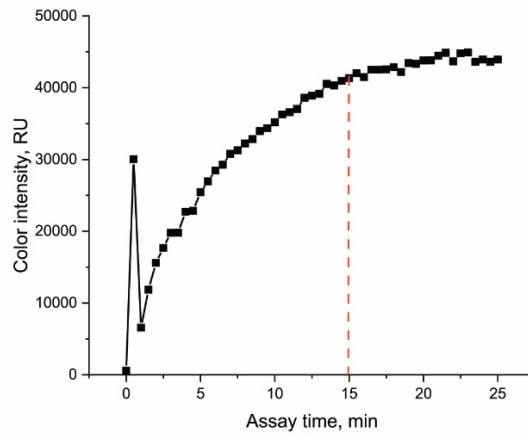

Fig. S7. Kinetics of staining development in the analytical zone (for cTnT)

Table S7. Specificity of the test system

| Protein                         | Human serum albumin | Human immunoglobulins G |    |              |
|---------------------------------|---------------------|-------------------------|----|--------------|
| Photo                           |                     |                         |    |              |
|                                 |                     |                         |    | Control zone |
|                                 |                     |                         |    | Test zone    |
| C(protein), µg mL <sup>-1</sup> | 25                  | 2500                    | 25 | 5000         |
